# Supplementary material for: The analysis of slip tendency of major tectonic faults in Germany
Source: Copernicus journal article supplement (doi:10.5194/egusphere-2022-26), 2022-03-08
Supplement: Supplementary file 3 [file Table S1.xlsx]

## Sheet: Tabelle1
Id	Name	In Semi-Realistic Fault set
1	Albstadt Shear Zone	x
2	Allertal Lineament	x
3	Alpine-Carpathian Arc	x
4	Boppard Thrust	-
5	Broud Fourteens Basin	-
6	Central Graben	-
7	Central Netherland Basin	-
8	Diendorf Fault	-
9	Donau Fault	-
10	Egge Fault	-
11	Eichenberg - Gotha - Saalfelder Fault Zone	-
12	Finne Fault	x
13	Franconian Line	x
14	Gardelegen Fault	x
15	Gifhorn Lineament	-
16	Glückstadt Graben	-
17	Haldensleben Fault	x
18	Horn Graben	-
19	Hronov–Porici Fault	-
20	Hunsrück Southern Boundary Fault	x
21	Jura Mountain	-
22	Kissingen-Haßfurter Fault Zone	-
23	Kyffhäuser Fault	x
24	Landshut-Neuoetting Fault	-
25	Lausittz Escarpement	x
26	Lausitz Thrust	x
27	Leinetal Graben	-
28	Main Intrasudetic Fault	-
29	Mariánské Lázne Fault	-
30	Metz Fault	-
31	Midi-Aachen Thrust	x
32	Niederrheingraben	-
33	Northern Harz Boundary Fault	x
34	Odra Fault	-
35	Ohre Graben	-
36	Osning Fault	x
37	Pfahl Fault	-
38	Randen-Bonndorf Fault	-
39	Rheder Moor-Blenhorst Fault	-
40	Rheinsberg Through	-
41	Rodl Fault	-
42	Roer Graben	x
43	Siegen Thrust	x
44	Sole Pit Basin	-
45	Southern Holy Cross Mountain Fault	-
46	Steinhudermeer Fault	-
47	STZ	-
48	Sudetic Marginal Fault	-
49	Swabian Lineament	x
50	Teisseyre-Tornquist-Zone	-
51	Upper Rhine Graben	x
52	Vitis Fault	-
53	Wittenberg Fault	x
				© EuroGeographics for the administrative boundaries
The table lists the faults implemented in the Andersonian Fault set and an ID they correspond to. Faults marked with an x are also present in the Semi-Realistic Fault set. The map shows the Andersonian fault set and the ID of each fault.
